# Supplementary material for: Double-Needle Meniscal Suture Technique: Technical Description and Clinical Application in Dogs
Source: Preprints.org preprint supplement (doi:10.20944/preprints202408.1832.v1), 2024-08-26
Supplement: Supplementary file 1 [file supplementary]

## Sheet: Foglio1
N.	Breed	Sex M/F	Body Weight (kg)	Age at surgery	Stifle	Concomitant disease	Meniscal lesion	Suture	Suture material	Time for meniscal suture (min)	Suture complication	Concomitant surgical procedure
1	Maremmano-abruzzese	F	42	5y 5m	Left	CCL rupture	Caudal horn medial meniscus	3 stitches: 2 vertical, 1 horizontal	1 polypropylene 2 PDS	48	Breakage of one PDS suture during insertion through meniscus	X-Porous TTA
2	Shorthair	F	24	11y 6m	Right	CCL rupture	Caudal horn medial meniscus	2 stiches: 2 vertical	2 polypropylene	65	Difficult visualization	X-Porous TTA
3	Cane Corso	F	40	1a 8m	Right	CCL rupture	Caudal horn medial meniscus	4 stitches: 2 crossed, 2 vertical	2 polypropylene 2 PDS	78	None	X-Porous TTA
4	Cane Corso	F	40	2y	Left	CCL rupture Tibia fracture	Caudal horn medial meniscus	2 stitches: 2 vertical	2 polypropylene	42	Breakage of one suture during insertion through meniscus	X-Porous TTA
5	Labrador	F	36	4y 10m	Left	CCL rupture	Caudal horn medial meniscus	3 stitches: 2 vertical, 1 horizontal	1 polypropylene 2 PDS	85	Difficult visualization Breakage of one suture during insertion through meniscus	X-Porous TTA
6	Mongrel	M	28	7y 1m	Right	CCL rupture	Caudal horn medial meniscus	2 stitches: 2 vertical	2 polypropylene	52	None	X-Porous TTA
7	Dobermann	F	32	1y 10m	Right	CCL rupture	Caudal horn medial meniscus	3 stitches: 2 crossed, 1 vertical	2 polypropylene 1 PDS	72	None	X-Porous TTA
8	Dobermann	F	32	5y 11m	Left	CCL rupture	Caudal horn medial meniscus	3 stitches: 3 vertical	1 polypropylene 2 PDS	83	None	X-Porous TTA
9	Boxer	M	35	10y 2m	Left	CCL rupture	Caudal horn medial meniscus	2 stitches: 2 vertical	2 polypropylene	45	None	X-Porous TTA
10	Cane Corso	M	48	1y 5m	Left	CCL rupture	Caudal horn medial meniscus	3 stitches: 3 vertical	1 polypropylene 2 PDS	68	None	X-Porous TTA
